# Supplementary material for: Repertoire of Computationally Designed Peroxygenases for Enantiodivergent C–H Oxyfunctionalization Reactions
Source: PubMed Central journal article supplement (PMC9936548; doi:10.1021/jacs.2c11118), 2023-01-23
Supplement: ja2c11118_si_001.pdf [file ja2c11118_si_001.pdf]

**Supplementary information for:**

**A repertoire of computationally designed  
peroxygenases for enantiodivergent C-H  
oxyfunctionalisation reactions**

Patricia Gomez de Santos<sup>1,2</sup>, Ivan Mateljak<sup>2</sup>, Manh Dat Hoang<sup>1,3</sup>, Sarel J. Fleishman<sup>4</sup>,  
Frank Hollmann<sup>5</sup> and Miguel Alcalde<sup>1\*</sup>

<sup>1</sup> Department of Biocatalysis, Institute of Catalysis, ICP-CSIC, C/ Marie Curie 2, 28049 Madrid, Spain.

<sup>2</sup> EvoEnzyme S.L., Parque Científico de Madrid, C/ Faraday 7, 28049 Madrid, Spain.

<sup>3</sup> Chair of Biochemical Engineering, Technical University of Munich, Boltzmannstr. 15, 85748 Garching, Germany.

<sup>4</sup> Department of Biomolecular Sciences, Weizmann Institute of Science, 7610001 Rehovot, Israel.

<sup>5</sup> Department of Biotechnology, Delft University of Technology, van der Massweg 9, 2629HZ Delft, The Netherlands.

\* Correspondence should be addressed to: M.A. ([malcalde@icp.csic.es](mailto:malcalde@icp.csic.es)).

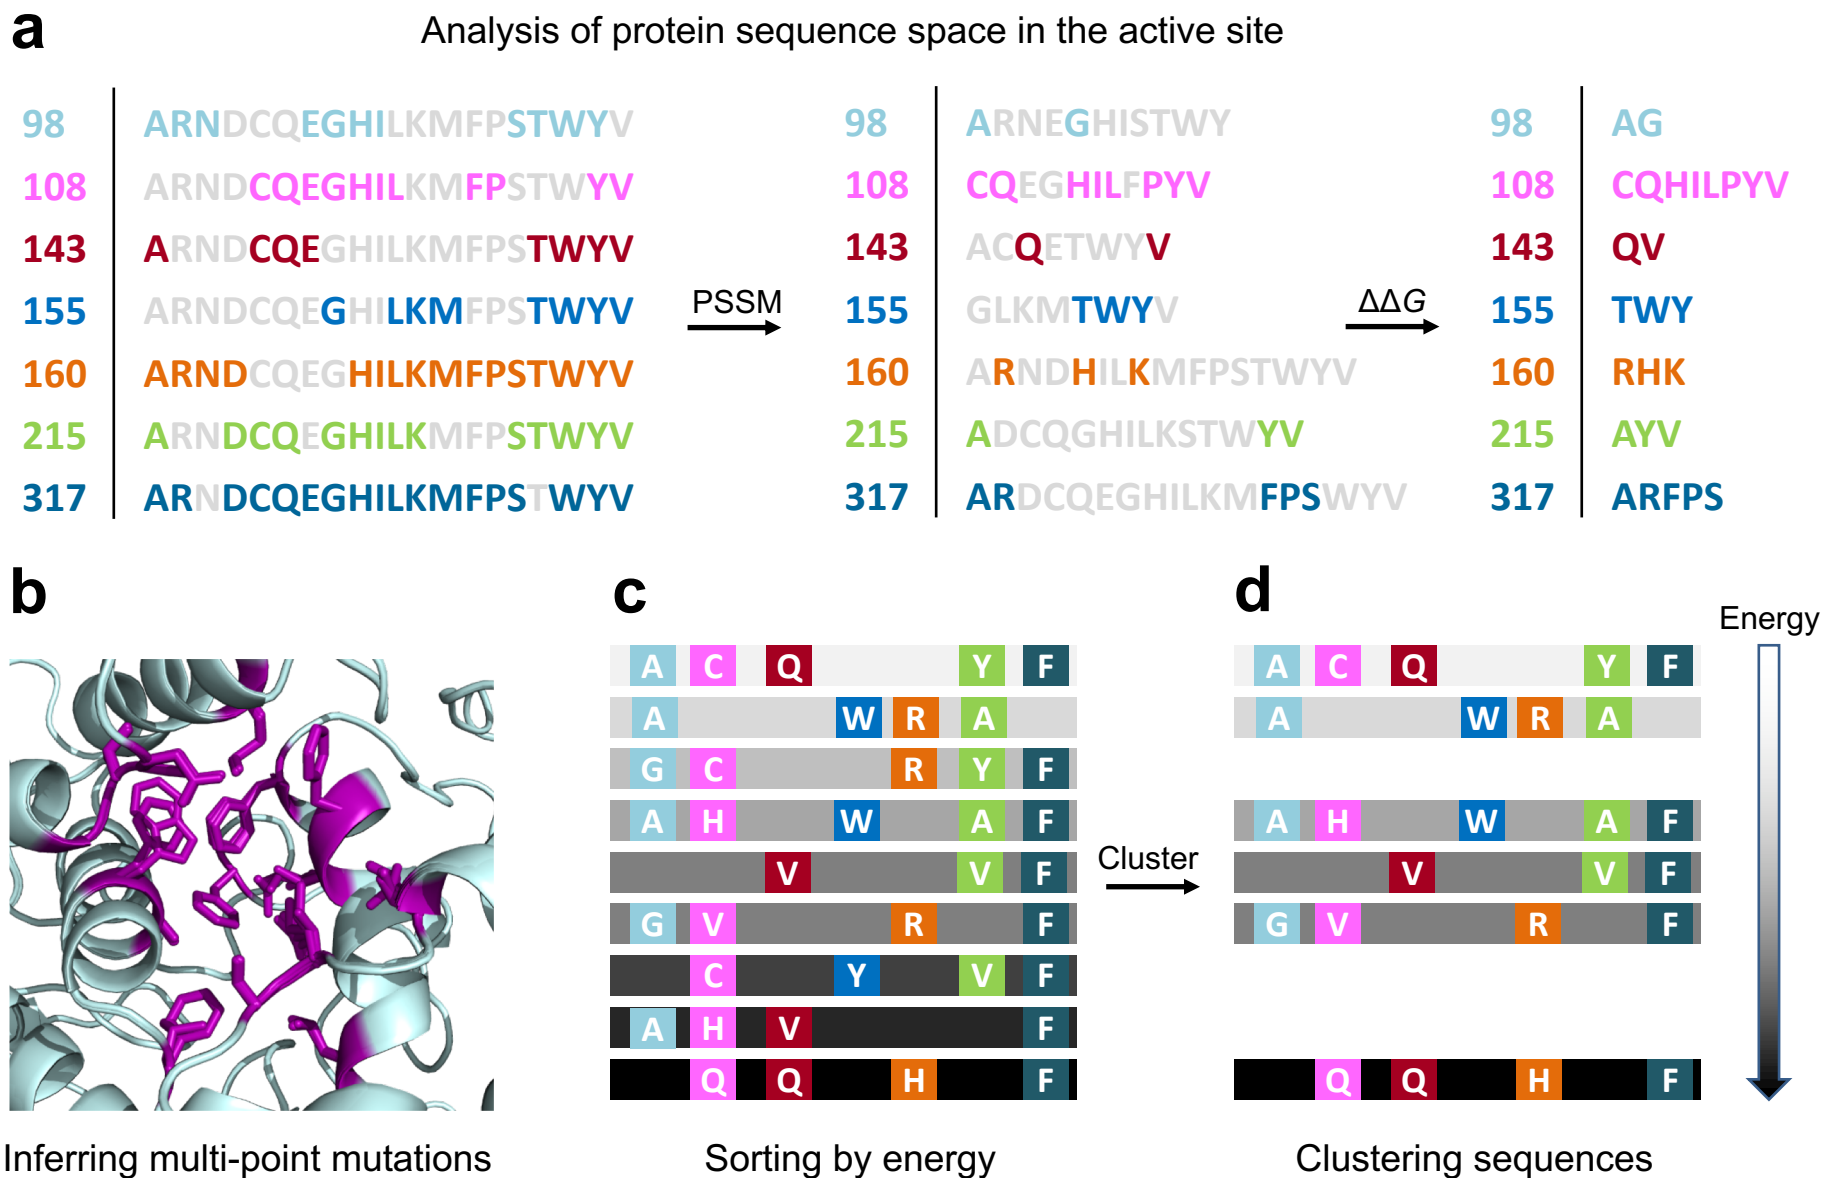

**Figure S1.** General workflow for FuncLib computational mutagenesis. (a) analysis of the sequence protein space focused on the catalytic pocket by position specific scoring matrix -PSSM- and selection of residues according to their energy in the context of the protein; (b) the multipoint mutations are inferred by Rosetta atomistic calculation, (c) sorted by energy and (d) clustered in specific sequences. Figure adapted from Khersonsky et al., 2018.

a

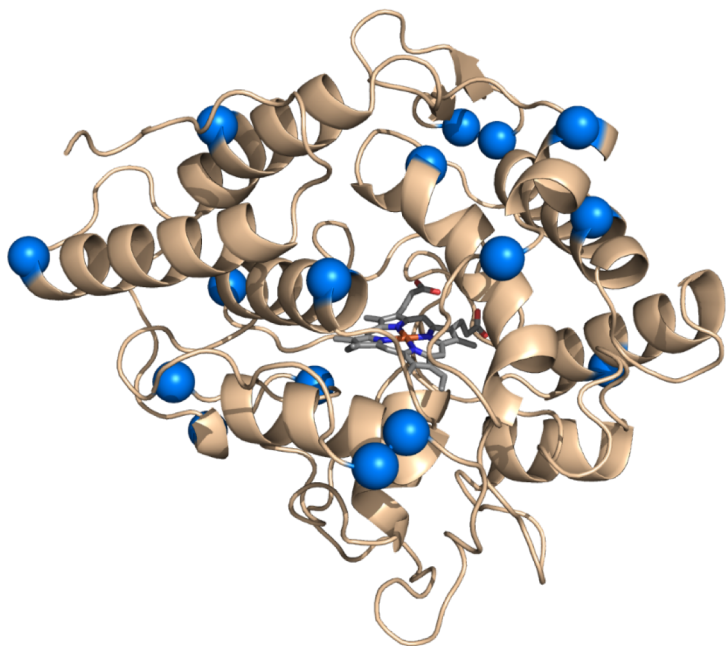

b

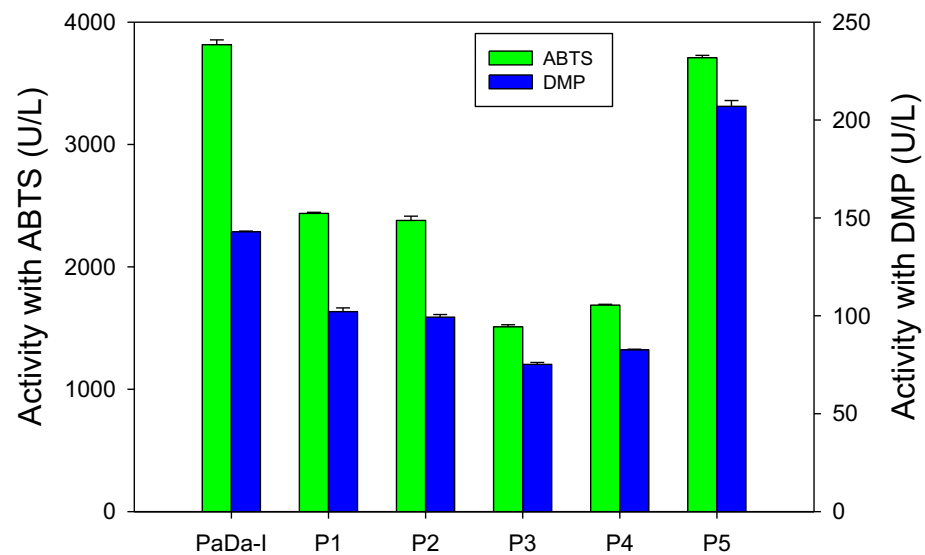

c

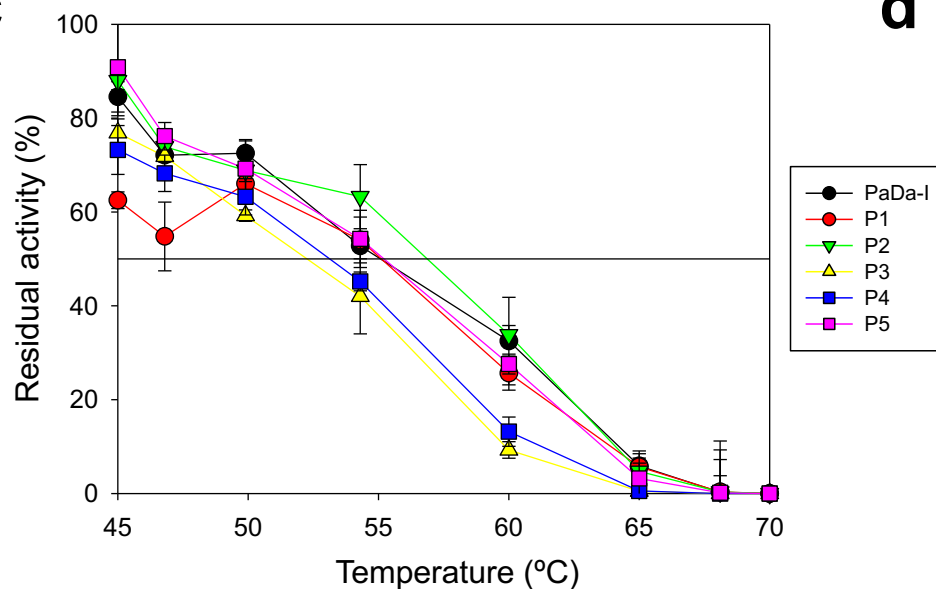

d

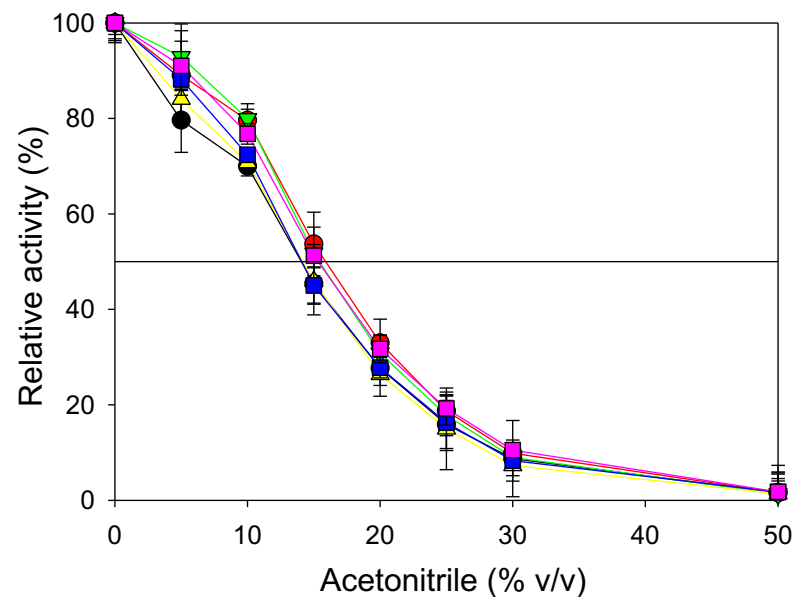

**Figure S2.** PROSS mutants and their biochemical properties (a) PROSS mutations within the UPO structure highlighted as blue spheres (figure visualized with PyMOL). (b) Total activity values measured with ABTS and DMP. (c) Thermostability ( $T_{50}$ ). (d) Activity in increasing concentrations of acetonitrile. The activity was measured with 2 mM  $H_2O_2$  and 1 mM ABTS in 100mM sodium phosphate/citrate buffer (pH 4.0) containing the corresponding concentration acetonitrile. Each point represents the mean and standard deviation of 3 independent experiments.

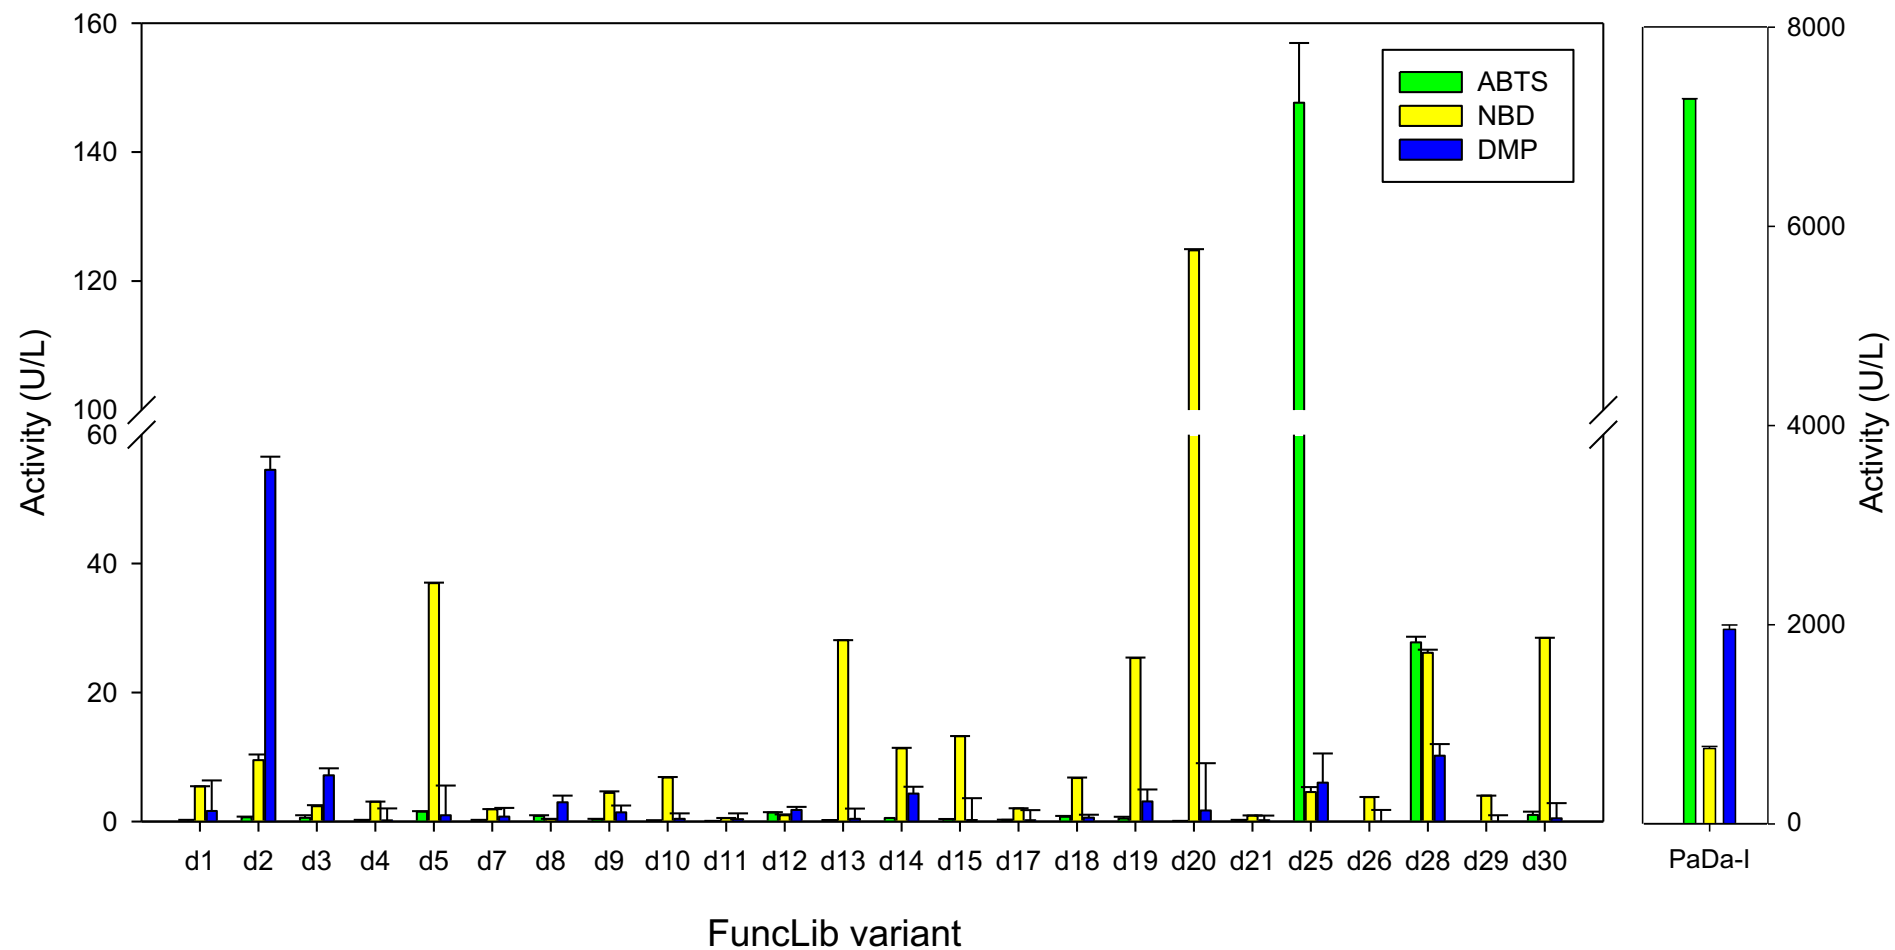

**Figure S3.** Activity profile of FuncLib variants and PaDa-I functional expressed by *S. cerevisiae*. Activities were measured with DMP, ABTS (peroxidase substrates) and NBD (peroxygenase substrate).

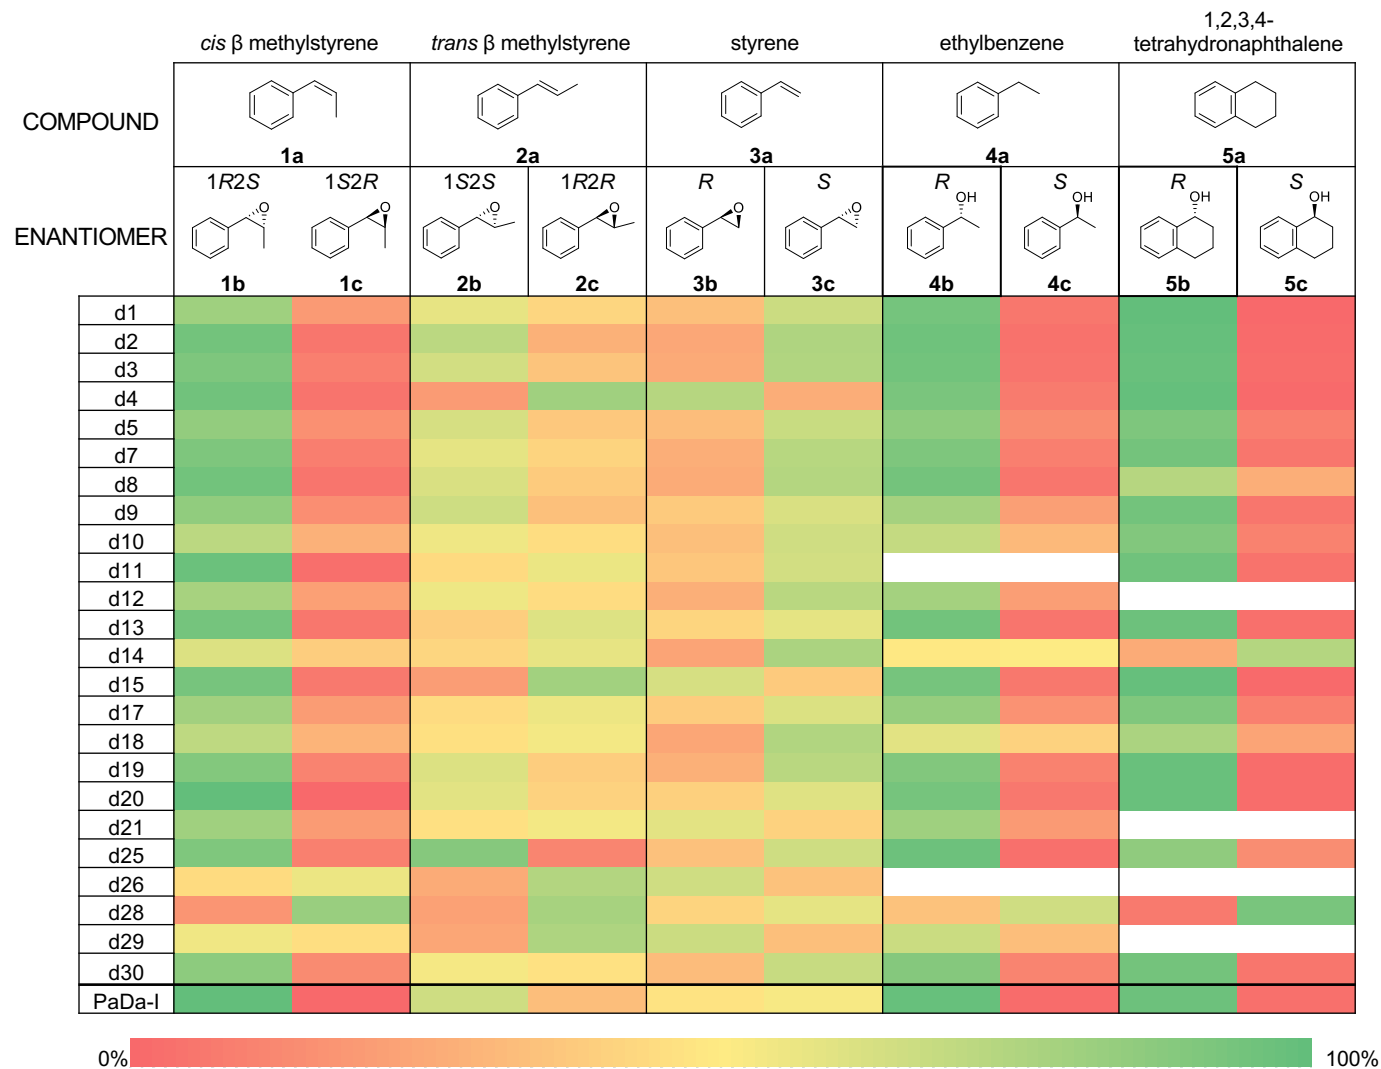

**Figure S4.** Heat map of different enantioselectivities of FuncLib designs compared to parental type PaDa-I. See also **Supplementary Tables S3, S4.**

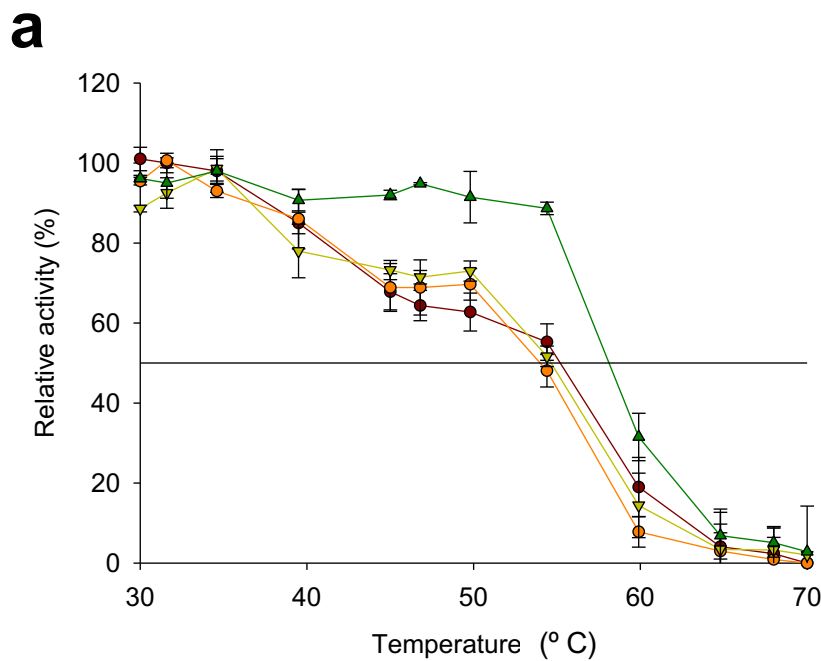**b**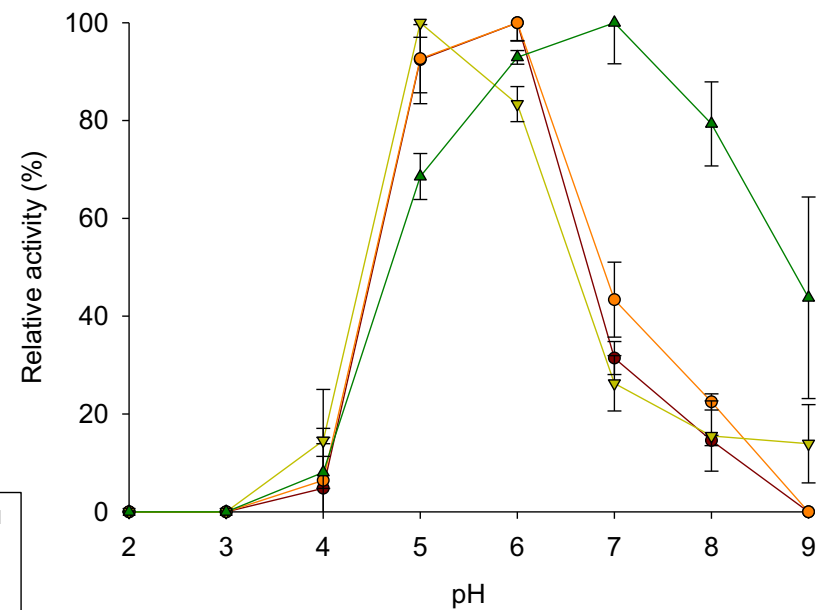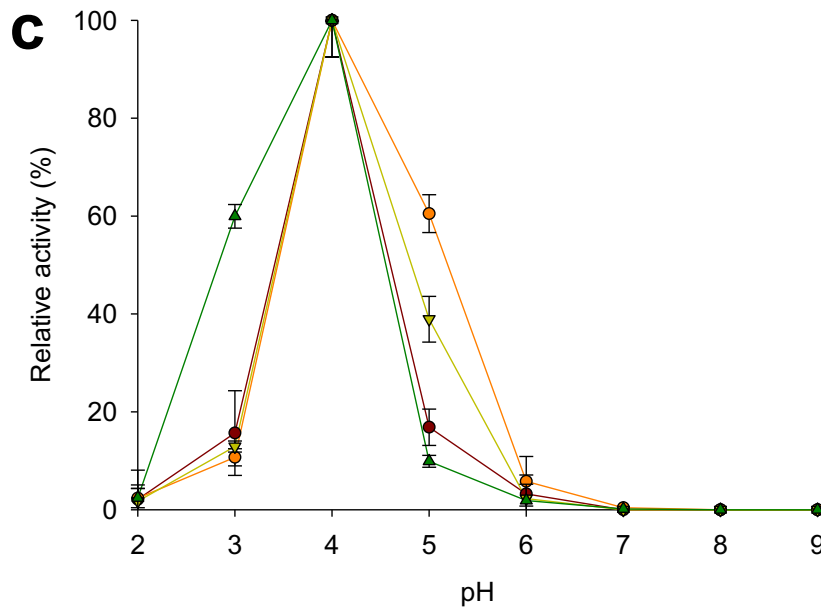**d**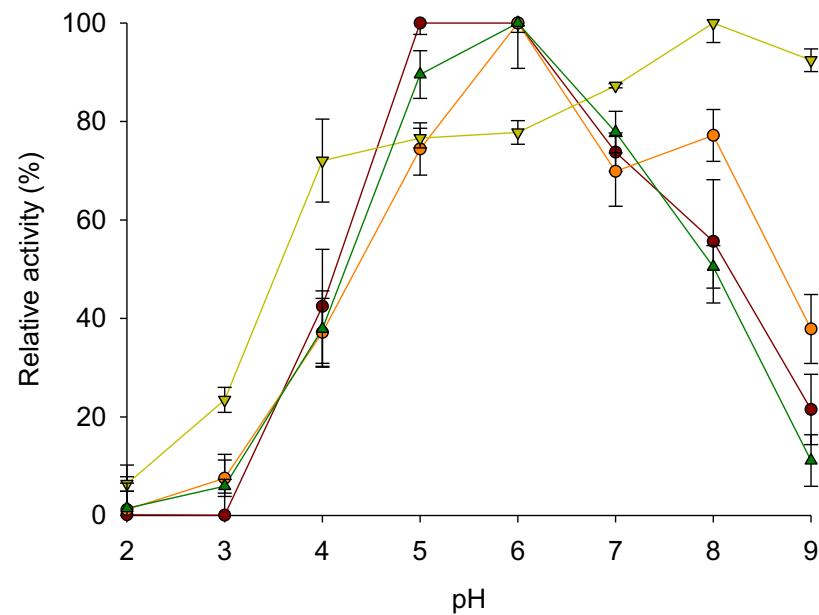

**Figure S5.** Biochemical characterization of Funclib variants and PaDa-I. **(a)** Kinetic thermostability ( $T_{50}$ ) and pH activity profiles measured with 1 mM NBD **(b)**, 1 mM ABTS **(c)** and 1 mM DMP **(d)** in 100mM Britton-Robinson buffer at different pHs from 2.0 to 9.0 containing 2 mM  $H_2O_2$ . Each point represents the mean and standard deviation from 3 independent experiments.

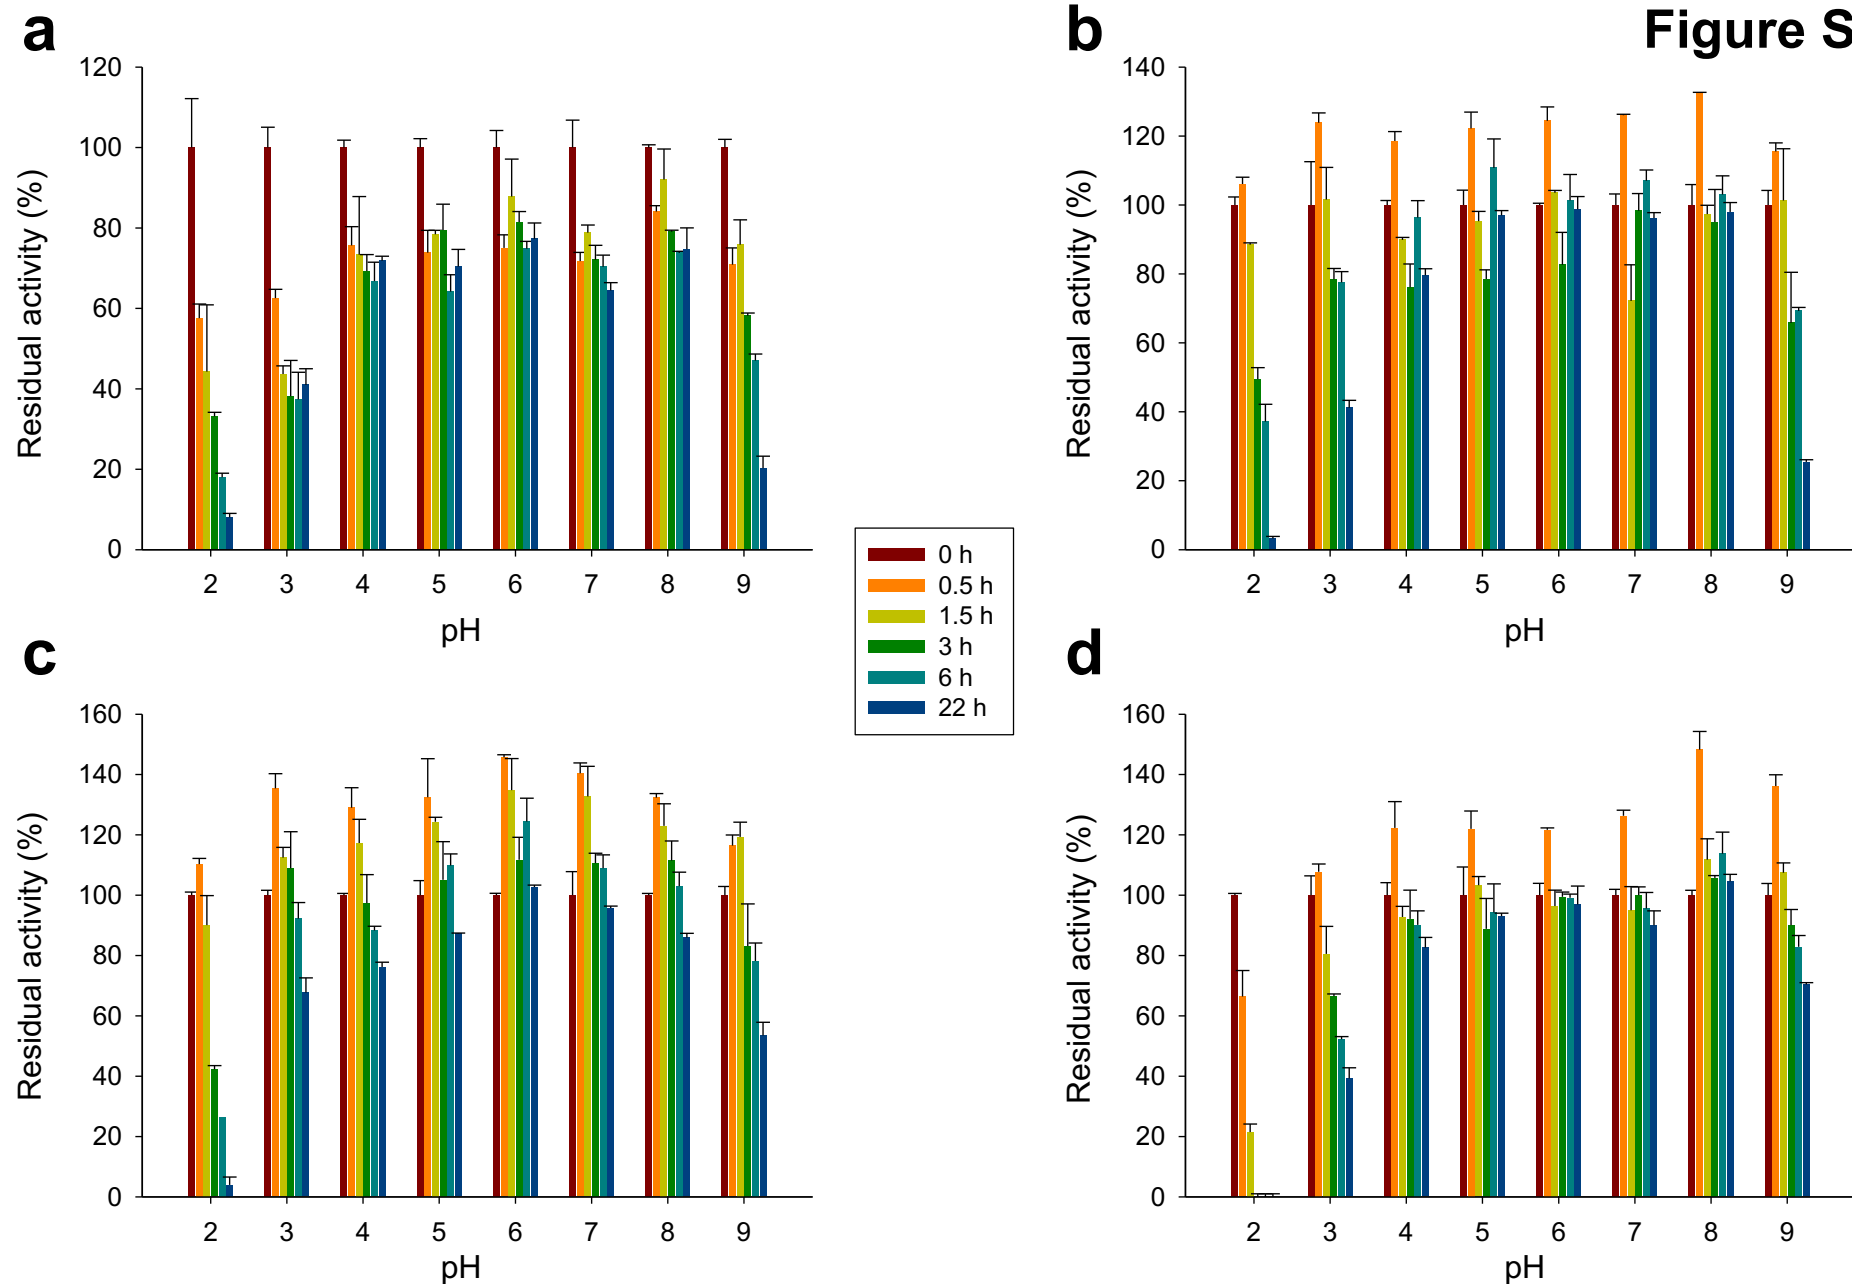

**Figure S6.** Biochemical characterization. pH stability of FuncLib variants and PaDa-I. (a) PaDa-I, (b) d2 mutant, (c) d4 mutant, (d) d8 mutant. Appropriate enzyme dilutions were incubated at different times over a range of pH values in 20mM Britton-Robinson buffer. Aliquots were removed at different times to measure activity with 5mM veratryl alcohol and 2mM H<sub>2</sub>O<sub>2</sub> in 100mM phosphate buffer (pH 7.0) at room temperature. Each point represents the mean and standard deviation from 3 independent experiments.

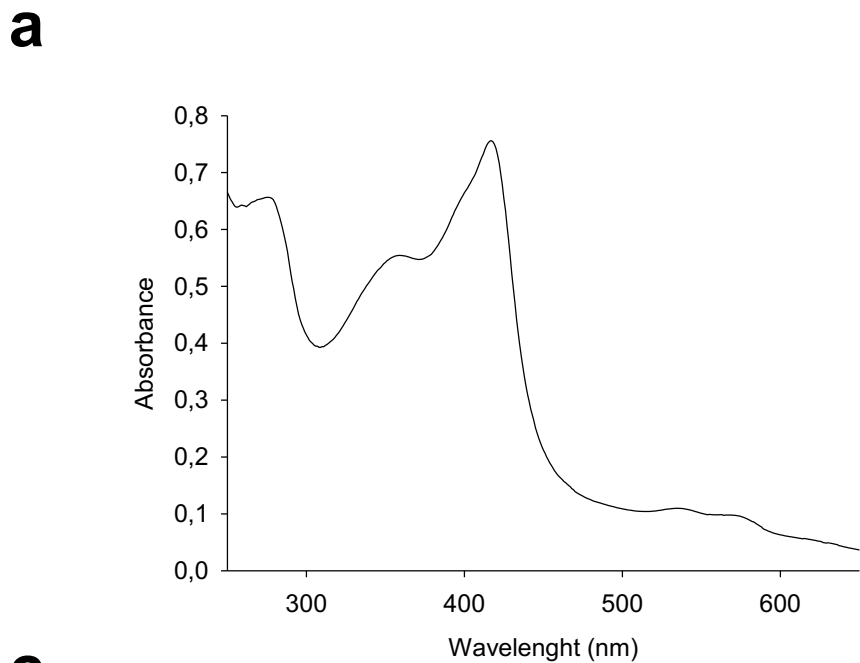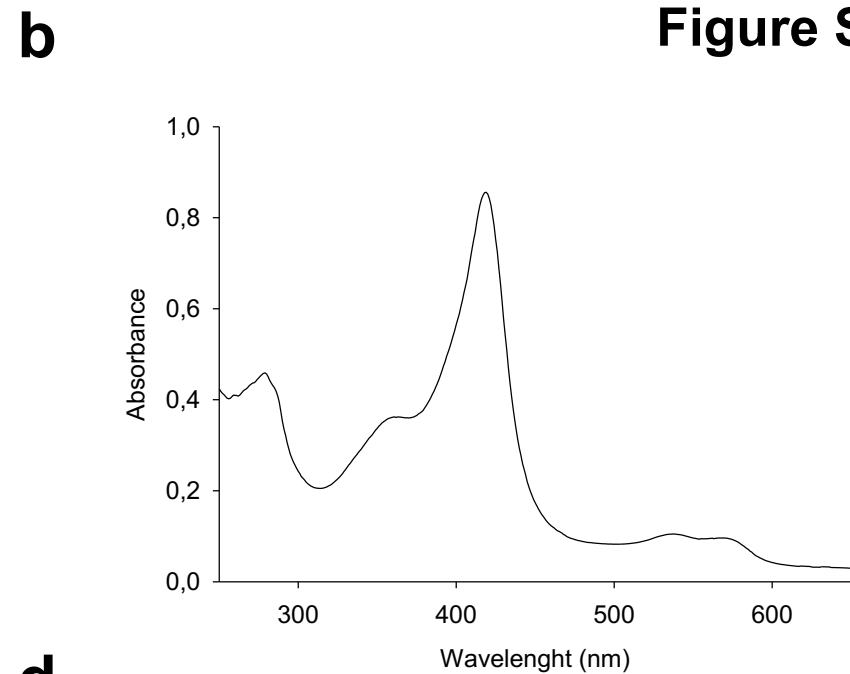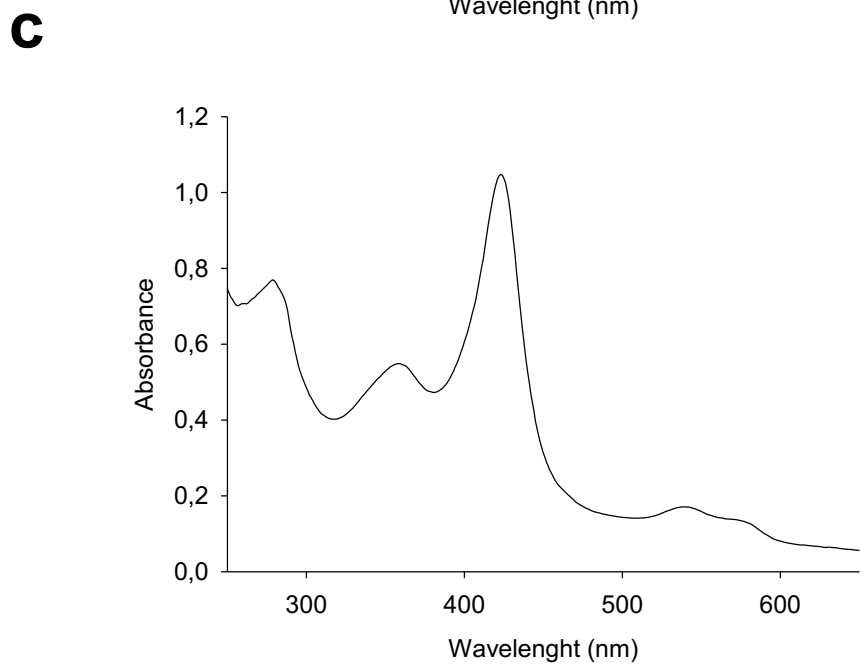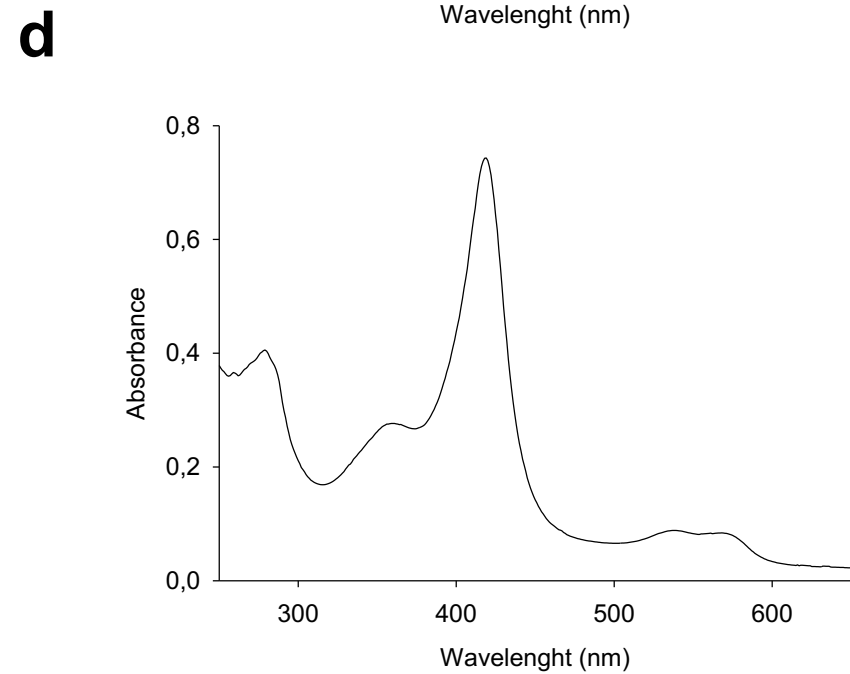

**Figure S7.** Spectroscopic characteristics of (a) PaDa-I, (b) d2, (c) d4 and (d) d28.



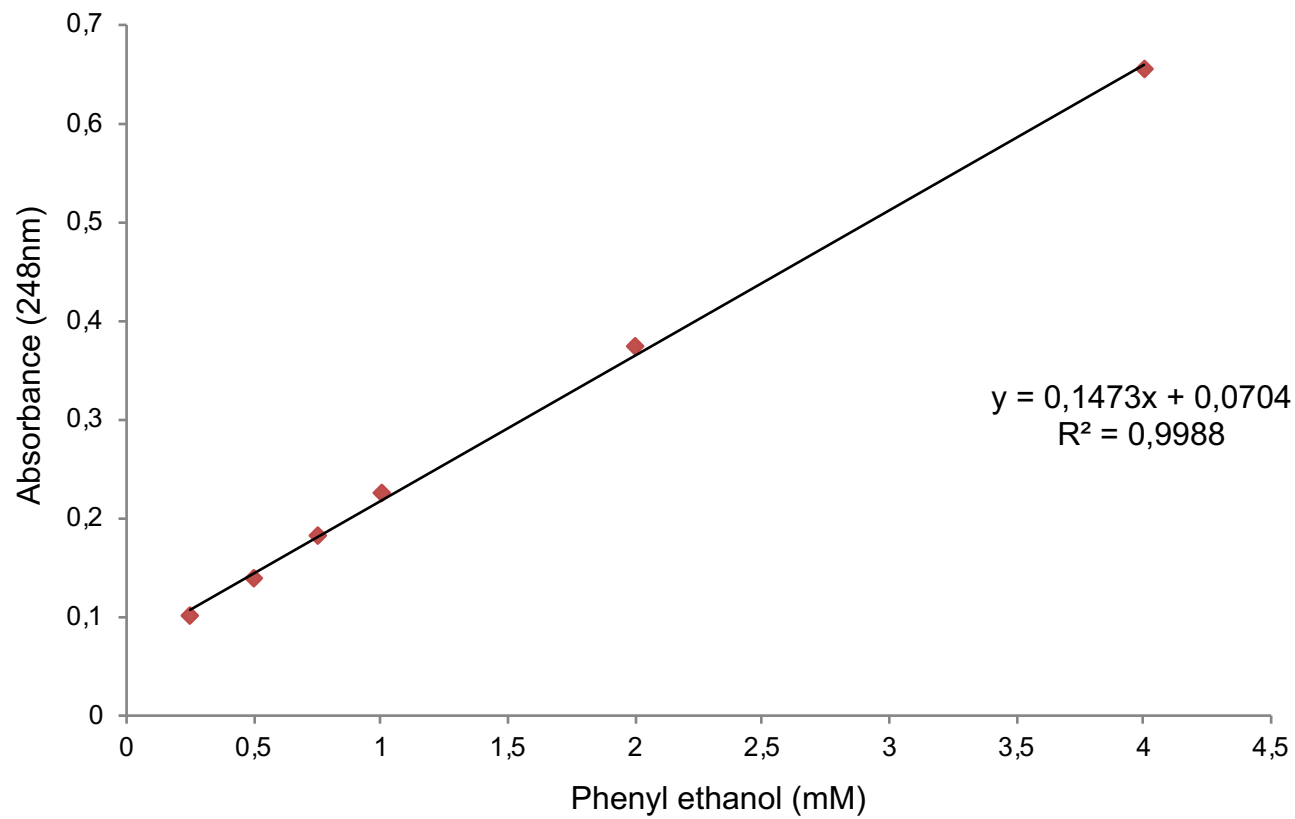

**Figure S8.** Experimental determination of the molar extinction coefficient for phenylethanol.

**Table S1.** Pross mutants selected in this study.

| PROSS mutant | Mutations                                                                                       |
|--------------|-------------------------------------------------------------------------------------------------|
| P1           | N11D, Q72D, G166A, V298G                                                                        |
| P2           | N11D, Q72D, G166A, K261G, V298G                                                                 |
| P3           | N11D, Q72D, R97G, S111T, G166A, F190Y, T242D, Q249N, K261G, N286L, V298G                        |
| P4           | N11D, Q72D, R97G, S111T, E146Q, G166A, F190Y, T242D, Q249N, K261G, I262V, N286L, V298G          |
| P5           | P5: N11D, S12N, Q72D, D91N, R97G, R100S, S111T, E146Q, G166A, F190Y, T242D, Q249A, K261G, I262V |

**Table S2.** Positions selected for Funclib diversification and their tolerated sequence space.

| Positions | Sequence space |
|-----------|----------------|
| 69        | FL             |
| 76        | FWY            |
| 77        | AI             |
| 121       | FIWY           |
| 188       | F              |
| 191       | F              |
| 192       | TACEHILMQSV    |
| 199       | FALY           |
| 240       | ST             |
| 241       | GAILMNSTVY     |
| 244       | VAIT           |
| 280       | MAT            |
| 314       | GA             |
| 315       | VY             |
| 316       | ADEHIKNPQSTV   |

**Table S3.** Enantiomeric excess (ee) of FunLib designs and parental type PaDa-I.

|        | <i>cis</i> $\beta$ methylstyrene oxide | <i>trans</i> $\beta$ methylstyrene oxide | Styrene oxide   | 1-phenyl ethanol |              | $\alpha$ -tetralol |                 |      |
|--------|----------------------------------------|------------------------------------------|-----------------|------------------|--------------|--------------------|-----------------|------|
|        | (1b) ee (1R2S) [%]                     | (2b) ee (1S2S) [%]                       | (3b) ee (R) [%] | (4b) ee (R) [%]  | <i>ortho</i> | <i>para</i>        | 1-ol            | 2-ol |
|        |                                        |                                          |                 |                  |              |                    | (5b) ee (R) [%] |      |
| d1     | 62                                     | 16                                       | -34             | 88               |              | 16                 | 100             | 7    |
| d2     | 90                                     | 44                                       | -52             | 92               |              | 5                  | 98              | 2    |
| d3     | 82                                     | 30                                       | -50             | 90               |              | 11                 | 96              | 2    |
| d4     | 92                                     | -62                                      | 48              | 86               |              | 2                  | 98              |      |
| d5     | 70                                     | 26                                       | -36             | 72               |              | 9                  | 82              | 7    |
| d7     | 84                                     | 18                                       | -46             | 82               | 63           |                    | 90              |      |
| d8     | 90                                     | 24                                       | -48             | 90               | 39           |                    | 46              |      |
| d9     | 70                                     | 32                                       | -24             | 58               |              |                    | 90              | 8    |
| d10    | 44                                     | 10                                       | -34             | 38               |              | 48                 | 80              | 14   |
| d11    | 96                                     | -12                                      | -28             | n.d.             |              |                    | 92              |      |
| d12    | 56                                     | 12                                       | -46             | 58               |              |                    | n.d.            |      |
| d13    | 88                                     | -22                                      | -16             | 90               | 6            |                    | 94              | 2    |
| d14    | 22                                     | -16                                      | -54             | -2               |              | 18                 | -48             | 11   |
| d15    | 88                                     | -60                                      | 26              | 88               |              |                    | 98              |      |
| d17    | 60                                     | -12                                      | -24             | 68               |              |                    | 82              | 5    |
| d18    | 42                                     | -8                                       | -52             | 20               |              | 25                 | 54              | 13   |
| d19    | 80                                     | 22                                       | -46             | 80               |              |                    | 96              | 4    |
| d20    | 100                                    | 18                                       | -20             | 88               |              |                    | 96              | 1    |
| d21    | 60                                     | -8                                       | 18              | 62               |              |                    | n.d.            |      |
| d25    | 82                                     | 78                                       | -32             | 94               |              |                    | 72              |      |
| d26    | -12                                    | -50                                      | 32              | n.d.             |              |                    | n.d.            |      |
| d28    | -66                                    | -59                                      | -18             | -32              |              |                    | -86             | 8    |
| d29    | 10                                     | -52                                      | 34              | 34               |              |                    | n.d.            |      |
| d30    | 74                                     | 8                                        | -36             | 78               |              | 6                  | 90              | 6    |
| PaDa-I | 100                                    | 32                                       | -6              | 98               |              |                    | 94              |      |

**Table S4.** Enantioselectivities of FuncLib designs and parental type PaDa-I. <sup>a</sup>% of total product. \*% of each enantiomer from the remaining product formed.

|        | <i>cis</i> $\beta$ methylstyrene (1a) |           | <i>trans</i> $\beta$ methylstyrene (2a) |           | Styrene (3a) |        | Ethylbenzene (4a) |         |                                  |                                 | 1,2,3,4 tetrahydronaphthalene (5a) |         |                   |
|--------|---------------------------------------|-----------|-----------------------------------------|-----------|--------------|--------|-------------------|---------|----------------------------------|---------------------------------|------------------------------------|---------|-------------------|
|        | (1b) 1R2S                             | (1c) 1S2R | (2b) 1S2S                               | (2c) 1R2R | (3b) R       | (3c) S | (4b) R*           | (4c) S* | <i>ortho</i> <sup>a</sup><br>-OH | <i>para</i> <sup>a</sup><br>-OH | 1-ol                               |         | 2-ol <sup>a</sup> |
|        |                                       |           |                                         |           |              |        |                   |         |                                  |                                 | (5b) R*                            | (5c) S* |                   |
| d1     | 81                                    | 19        | 58                                      | 42        | 33           | 67     | 94                | 6       |                                  | 16                              | 100                                | 0       | 7                 |
| d2     | 95                                    | 5         | 72                                      | 28        | 24           | 76     | 96                | 4       |                                  | 5                               | 99                                 | 1       | 2                 |
| d3     | 91                                    | 9         | 65                                      | 35        | 25           | 75     | 95                | 5       |                                  | 11                              | 98                                 | 2       | 2                 |
| d4     | 96                                    | 4         | 19                                      | 81        | 74           | 26     | 93                | 7       |                                  | 2                               | 99                                 | 1       |                   |
| d5     | 85                                    | 15        | 63                                      | 37        | 32           | 68     | 86                | 14      |                                  | 9                               | 91                                 | 9       | 7                 |
| d7     | 92                                    | 8         | 59                                      | 41        | 27           | 73     | 91                | 9       | 63                               |                                 | 95                                 | 5       |                   |
| d8     | 95                                    | 5         | 62                                      | 38        | 26           | 74     | 95                | 5       | 39                               |                                 | 73                                 | 27      |                   |
| d9     | 85                                    | 15        | 66                                      | 34        | 38           | 62     | 79                | 21      |                                  |                                 | 95                                 | 5       | 8                 |
| d10    | 72                                    | 28        | 55                                      | 45        | 33           | 67     | 69                | 31      |                                  | 48                              | 90                                 | 10      | 14                |
| d11    | 98                                    | 2         | 44                                      | 56        | 36           | 64     | ---               | ---     |                                  |                                 | 96                                 | 4       |                   |
| d12    | 78                                    | 22        | 56                                      | 44        | 27           | 73     | 79                | 21      |                                  |                                 | ---                                | ---     |                   |
| d13    | 94                                    | 6         | 39                                      | 61        | 42           | 58     | 95                | 5       | 6                                |                                 | 97                                 | 3       | 2                 |
| d14    | 61                                    | 39        | 42                                      | 58        | 23           | 77     | 49                | 51      |                                  | 18                              | 26                                 | 74      | 11                |
| d15    | 94                                    | 6         | 20                                      | 80        | 63           | 37     | 94                | 6       |                                  |                                 | 99                                 | 1       |                   |
| d17    | 80                                    | 20        | 44                                      | 56        | 38           | 62     | 84                | 16      |                                  |                                 | 91                                 | 9       | 5                 |
| d18    | 71                                    | 29        | 46                                      | 54        | 24           | 76     | 60                | 40      |                                  | 25                              | 77                                 | 23      | 13                |
| d19    | 90                                    | 10        | 61                                      | 39        | 27           | 73     | 90                | 10      |                                  |                                 | 98                                 | 2       | 4                 |
| d20    | 100                                   |           | 59                                      | 41        | 40           | 60     | 94                | 6       |                                  |                                 | 98                                 | 2       | 1                 |
| d21    | 80                                    | 20        | 46                                      | 54        | 59           | 41     | 81                | 19      |                                  |                                 |                                    |         |                   |
| d25    | 91                                    | 9         | 89                                      | 11        | 34           | 66     | 97                | 3       |                                  |                                 | 86                                 | 14      |                   |
| d26    | 44                                    | 56        | 25                                      | 75        | 66           | 34     | ---               | ---     |                                  |                                 | ---                                | ---     |                   |
| d28    | 17                                    | 83        | 22                                      | 78        | 41           | 59     | 34                | 66      |                                  |                                 | 7                                  | 93      | 8                 |
| d29    | 55                                    | 45        | 24                                      | 76        | 67           | 33     | 67                | 33      |                                  |                                 | ---                                | ---     |                   |
| d30    | 87                                    | 13        | 54                                      | 46        | 32           | 68     | 89                | 11      |                                  | 6                               | 95                                 | 5       | 6                 |
| PaDa-I | 100                                   | 0         | 66                                      | 34        | 47           | 53     | 99                | 1       |                                  |                                 | 97                                 | 3       |                   |

**Table S5.** GC analytics.

| Compound        | Column temperature                                                               | Program/ gradient retention    | Retention time                                                           |
|-----------------|----------------------------------------------------------------------------------|--------------------------------|--------------------------------------------------------------------------|
| <b>1a/1b/1c</b> | Lipodex E (Macherey-Nagel)<br>(50 m × 0.25 mm × 0.25 μm)<br>carrier gas: He      | 120°C hold 5.0 min             | 8.67 min <i>cis</i> -β-methylstyrene                                     |
|                 |                                                                                  | 10°C/min to 210°C hold 1.0 min | 11.18 min (1 <i>R</i> ,2 <i>S</i> )- <i>cis</i> -β-methylstyrene oxide   |
|                 |                                                                                  |                                | 11.60 min (1 <i>S</i> ,2 <i>R</i> )- <i>cis</i> -β-methylstyrene oxide   |
| <b>2a/2b/2c</b> | Lipodex E (Macherey-Nagel)<br>(50 m × 0.25 mm × 0.25 μm)<br>carrier gas: He      | 120°C hold 3.0 min             | 9.80 min <i>trans</i> -β-methylstyrene                                   |
|                 |                                                                                  | 2°C/min to 150°C hold 1.0 min  | 12.97 min (1 <i>S</i> ,2 <i>S</i> )- <i>trans</i> -β-methylstyrene oxide |
|                 |                                                                                  | 20°C/min to 180°C              | 13.25 min (1 <i>R</i> ,2 <i>R</i> )- <i>trans</i> -β-methylstyrene oxide |
| <b>3a/3b/3c</b> | CP-Chirasil-Dex-CB<br>(Agilent)<br>(25 m × 0.32 mm × 0.25 μm)<br>carrier gas: He | 100°C hold 8.0 min,            | 2.15 min styrene                                                         |
|                 |                                                                                  | 20°C/min to 220°C hold 1.0 min | 6.05 min ( <i>R</i> )-styrene oxide                                      |
|                 |                                                                                  |                                | 6.50 min ( <i>S</i> )-styrene oxide                                      |
| <b>4a/4b/4c</b> | CP-Chirasil-Dex-CB<br>(Agilent)<br>(25 m × 0.32 mm × 0.25 μm)<br>carrier gas: He | 120°C hold 2.6 min,            | 1.49 min ethylbenzene                                                    |
|                 |                                                                                  | 15°C/min to 135°C hold 3.3 min | 4.70 min ( <i>R</i> )-1-phenylethanol                                    |
|                 |                                                                                  | 25°C/min to 225°C hold 1.0 min | 4.91 min ( <i>S</i> )-1-phenylethanol                                    |
|                 |                                                                                  |                                | 6.82 min 2-ethylphenol                                                   |
|                 |                                                                                  |                                | 7.36 min 4-ethylphenol                                                   |
| <b>5a/5b/5c</b> | CP-Chirasil-Dex-CB<br>(Agilent)<br>(25 m × 0.32 mm × 0.25 μm)<br>carrier gas: He | 120°C hold 3.0 min,            | 4.3 min 1,2,3,4-tetrahydronaphthalene                                    |
|                 |                                                                                  | 5°C/min to 140°C hold 12.0 min | 13.56 min ( <i>S</i> )-α-tetralol                                        |
|                 |                                                                                  | 25°C/min to 190°C hold 2.0 min | 13.92 min ( <i>R</i> )-α-tetralol                                        |
|                 |                                                                                  |                                | 15.77 min 1,2,3,4-tetrahydro-2-naphthol                                  |
